# Supplementary material for: A Functional Polymorphism in the 3'-UTR of PXR Interacts with Smoking to Increase Lung Cancer Risk in Southern and Eastern Chinese Smoker
Source: PubMed Central journal article supplement (PMC4227172; doi:10.3390/ijms151017457), 2014-09-29
Supplement: ijms-15-17457-s001.pdf [file ijms-15-17457-s001.pdf]

## Supplementary Information

**Table S1.** Frequency distributions of selected variables in lung cancer patients and cancer-free controls.

| Variables                     | Discovery Set (Southern Chinese)        |                                            |                       | Validation Set (Eastern Chinese)       |                                           |                         | Merged Set                              |                                            |                         |
|-------------------------------|-----------------------------------------|--------------------------------------------|-----------------------|----------------------------------------|-------------------------------------------|-------------------------|-----------------------------------------|--------------------------------------------|-------------------------|
|                               | Case<br>( <i>n</i> = 1056) <i>n</i> (%) | Control<br>( <i>n</i> = 1056) <i>n</i> (%) | <i>P</i> <sup>a</sup> | Case<br>( <i>n</i> = 503) <i>n</i> (%) | Control<br>( <i>n</i> = 623) <i>n</i> (%) | <i>P</i> <sup>a</sup>   | Case<br>( <i>n</i> = 1559) <i>n</i> (%) | Control<br>( <i>n</i> = 1679) <i>n</i> (%) | <i>P</i> <sup>a</sup>   |
| Age (years)                   |                                         |                                            |                       |                                        |                                           |                         |                                         |                                            |                         |
| ≤ 60                          | 536 (50.8)                              | 534 (50.6)                                 | 0.931                 | 273 (54.3)                             | 343 (55.1)                                | 0.793                   | 809 (51.9)                              | 877 (52.2)                                 | 0.846                   |
| > 60                          | 520 (49.2)                              | 522 (49.4)                                 |                       | 230 (45.7)                             | 280 (44.9)                                |                         | 750 (48.1)                              | 802 (47.8)                                 |                         |
| Sex                           |                                         |                                            |                       |                                        |                                           |                         |                                         |                                            |                         |
| Male                          | 746 (70.6)                              | 746 (70.6)                                 | 1.000                 | 345 (66.6)                             | 433 (70.4)                                | 0.496                   | 1091 (70.0)                             | 1185 (70.5)                                | 0.710                   |
| Female                        | 310 (29.4)                              | 310 (29.4)                                 |                       | 158 (31.4)                             | 184 (29.6)                                |                         | 468 (30.0)                              | 494 (29.5)                                 |                         |
| Family history of cancer      |                                         |                                            |                       |                                        |                                           |                         |                                         |                                            |                         |
| Yes                           | 104 (9.9)                               | 103 (9.8)                                  | 0.942                 | 25 (5.0)                               | 44 (7.1)                                  | 0.046                   | 129 (8.3)                               | 147 (8.8)                                  | 0.625                   |
| No                            | 952 (90.1)                              | 953 (90.2)                                 |                       | 478 (95.0)                             | 579 (92.9)                                |                         | 1430 (91.7)                             | 1532 (91.2)                                |                         |
| Family history of lung cancer |                                         |                                            |                       |                                        |                                           |                         |                                         |                                            |                         |
| Yes                           | 42 (4.0)                                | 30 (2.8)                                   | 0.150                 | 10 (2.0)                               | 13 (2.1)                                  | 0.907                   | 52 (3.3)                                | 43 (2.6)                                   | 0.192                   |
| No                            | 1014 (96.0)                             | 1026 (97.2)                                |                       | 493 (98.0)                             | 610 (97.9)                                |                         | 1507 (96.7)                             | 1636 (97.4)                                |                         |
| Smoking status                |                                         |                                            |                       |                                        |                                           |                         |                                         |                                            |                         |
| Ever                          | 601 (56.6)                              | 542 (51.4)                                 | 0.028                 | 223 (44.4)                             | 225 (35.8)                                | 1.79 × 10 <sup>-7</sup> | 824 (52.8)                              | 765 (45.6)                                 | 1.48 × 10 <sup>-6</sup> |
| Never                         | 455 (43.1)                              | 514 (48.7)                                 |                       | 280 (55.6)                             | 400 (64.2)                                |                         | 735 (47.2)                              | 914 (54.4)                                 |                         |
| Drinking status               |                                         |                                            |                       |                                        |                                           |                         |                                         |                                            |                         |
| Ever                          | 229 (21.7)                              | 227 (21.5)                                 | 0.042                 | 64 (12.8)                              | 115 (18.4)                                | 0.017                   | 293 (19.8)                              | 342 (20.3)                                 | 0.049                   |
| Never                         | 827 (78.3)                              | 829 (78.5)                                 |                       | 439 (87.2)                             | 508 (81.6)                                |                         | 1266 (81.2)                             | 1337 (79.7)                                |                         |
| Histological types            |                                         |                                            |                       |                                        |                                           |                         |                                         |                                            |                         |
| Adenocarcinoma                | 384 (36.4)                              |                                            |                       | 231 (45.9)                             |                                           |                         | 615 (39.4)                              |                                            |                         |
| Squamous cell carcinoma       | 369 (34.9)                              |                                            |                       | 158 (31.4)                             |                                           |                         | 527 (33.8)                              |                                            |                         |
| Large cell carcinoma          | 43 (4.1)                                |                                            |                       | 23 (4.6)                               |                                           |                         | 66 (4.2)                                |                                            |                         |
| Small cell lung cancer        | 128 (12.1)                              |                                            |                       | 65 (12.9)                              |                                           |                         | 193 (12.4)                              |                                            |                         |
| Other carcinomas <sup>b</sup> | 132 (12.5)                              |                                            |                       | 26 (5.2)                               |                                           |                         | 158 (10.2)                              |                                            |                         |

Table S1. Cont.

| Variables | Discovery Set (Southern Chinese) |                             |                       | Validation Set (Eastern Chinese) |                            |                       | Merged Set               |                             |                       |
|-----------|----------------------------------|-----------------------------|-----------------------|----------------------------------|----------------------------|-----------------------|--------------------------|-----------------------------|-----------------------|
|           | Case<br>(n = 1056) n (%)         | Control<br>(n = 1056) n (%) | <i>p</i> <sup>a</sup> | Case<br>(n = 503) n (%)          | Control<br>(n = 623) n (%) | <i>p</i> <sup>a</sup> | Case<br>(n = 1559) n (%) | Control<br>(n = 1679) n (%) | <i>p</i> <sup>a</sup> |
|           | Stages                           |                             |                       |                                  |                            |                       |                          |                             |                       |
| I         | 154 (14.6)                       |                             |                       | 46 (9.2)                         |                            |                       | 200 (12.8)               |                             |                       |
| II        | 94 (8.9)                         |                             |                       | 53 (10.5)                        |                            |                       | 147 (9.5)                |                             |                       |
| III       | 333 (31.5)                       |                             |                       | 157 (31.2)                       |                            |                       | 490 (31.4)               |                             |                       |
| IV        | 475 (45.0)                       |                             |                       | 247 (49.1)                       |                            |                       | 722 (46.3)               |                             |                       |

<sup>a</sup> *p* values for a  $\chi^2$  test; and <sup>b</sup> Mixed-cell or undifferentiated carcinoma.

Table S2. Primary information on the TaqMan assay of three tagSNPs in the *PXR* gene.

| SNP, rs no. | Variants | Primers                                 | Probes <sup>a</sup>                                                                                                                                       | Color (genotype)      |
|-------------|----------|-----------------------------------------|-----------------------------------------------------------------------------------------------------------------------------------------------------------|-----------------------|
| rs3814055   | C>T      | CCTGAAGACAACCTGTGGTCATTTT (forward)     | FAM-AATCCCAGGTT <b><i>C</i></b> <b><i>T</i></b> <b><i>C</i></b>                                                                                           | Blue (CC)             |
|             |          | CACGATTGAGCAAACAGGTAGAA (reverse)       | HEX-AATCCCAGGTT <b><i>T</i></b> <b><i>T</i></b> <b><i>C</i></b>                                                                                           | Red (TT)<br>Green(TC) |
| rs3732360   | C>T      | GGGCTCCAGGCCTGTACTC (forward)           | FAM-CGGCAGG <b><i>C</i></b> <b><i>G</i></b> <b><i>C</i></b> <b><i>A</i></b> <b><i>T</i></b> <b><i>G</i></b>                                               | Blue (CC)             |
|             |          | GGCCTCCTGGCTTCTCATCT (reverse)          | HEX-TCGGCAGG <b><i>T</i></b> <b><i>G</i></b> <b><i>C</i></b> <b><i>A</i></b> <b><i>T</i></b>                                                              | Red (TT)<br>Green(TC) |
| rs3814058   | C>T      | GGCATTCCACACCTAAGAAGTACTAGTTT (forward) | FAM-ATTTG <b><i>C</i></b> <b><i>C</i></b> <b><i>A</i></b> <b><i>T</i></b> <b><i>T</i></b> <b><i>A</i></b> <b><i>A</i></b> <b><i>A</i></b> <b><i>C</i></b> | Blue (CC)             |
|             |          | CCCCTCTAGCCAAAAGTACATTATTT (reverse)    | HEX-ATTTG <b><i>T</i></b> <b><i>C</i></b> <b><i>A</i></b> <b><i>T</i></b> <b><i>T</i></b> <b><i>A</i></b> <b><i>A</i></b> <b><i>A</i></b> <b><i>C</i></b> | Red (TT)<br>Green(TC) |

<sup>a</sup> Bold italic nucleotides indicate the polymorphic sites in probes.

**Figure S1.** The difference of relative mRNA levels of *PXR* in lung cancer tissues by the rs3814058C>T genotypes.

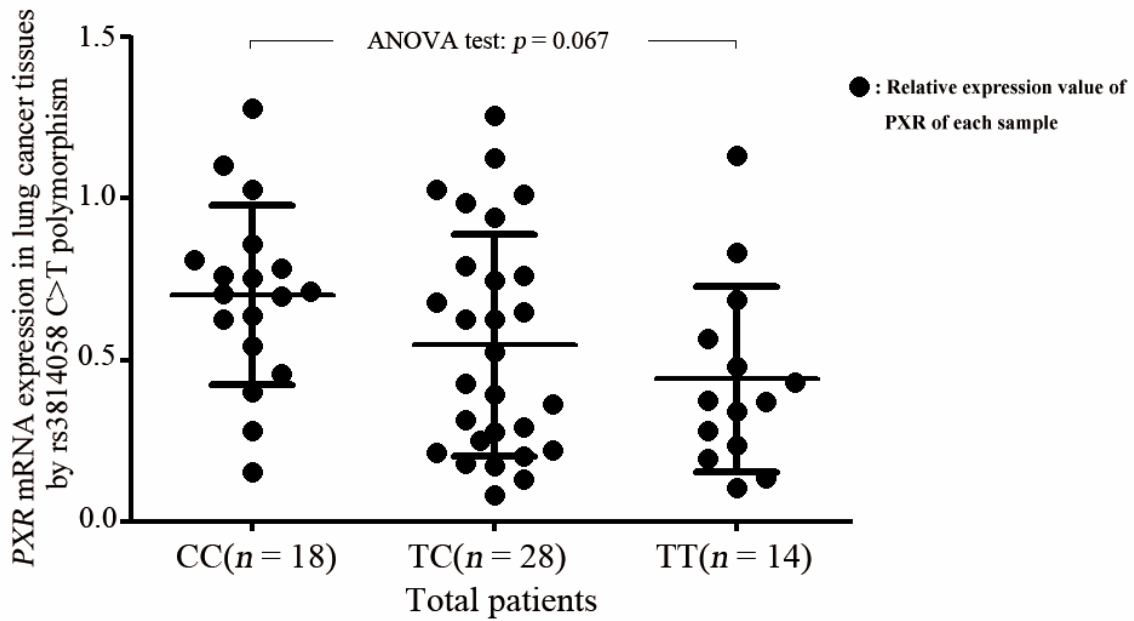

**Figure S2.** The gene structure of *PXR* and LD plot (A,B), and (C) genotyping production sketch of *PXR* SNPs.

**PXR: 3q12-q13.3**

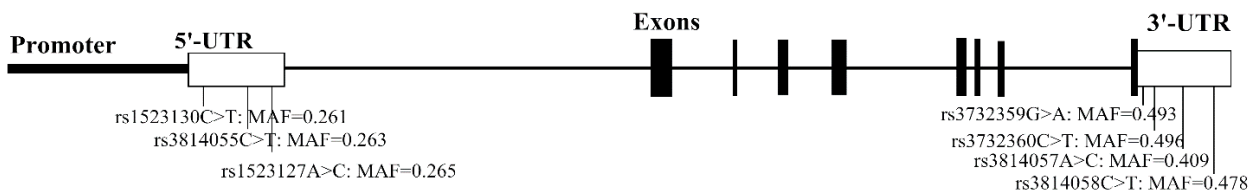

(A)

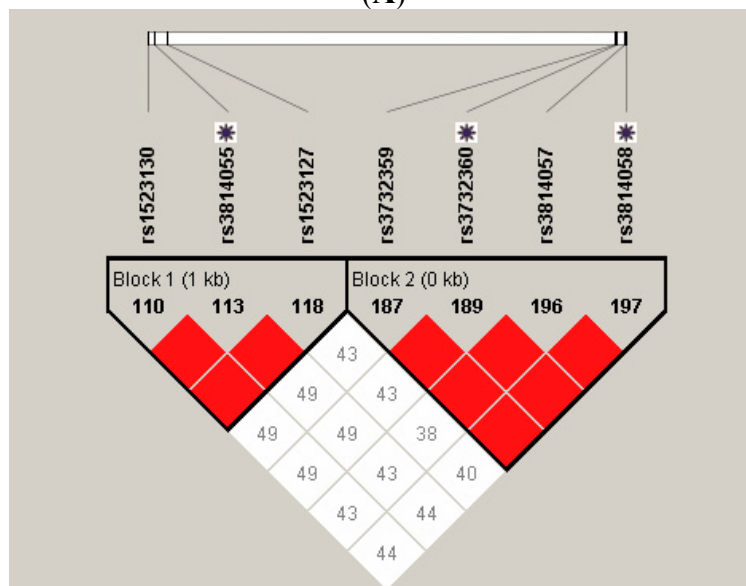

(B)

Figure S2. Cont.

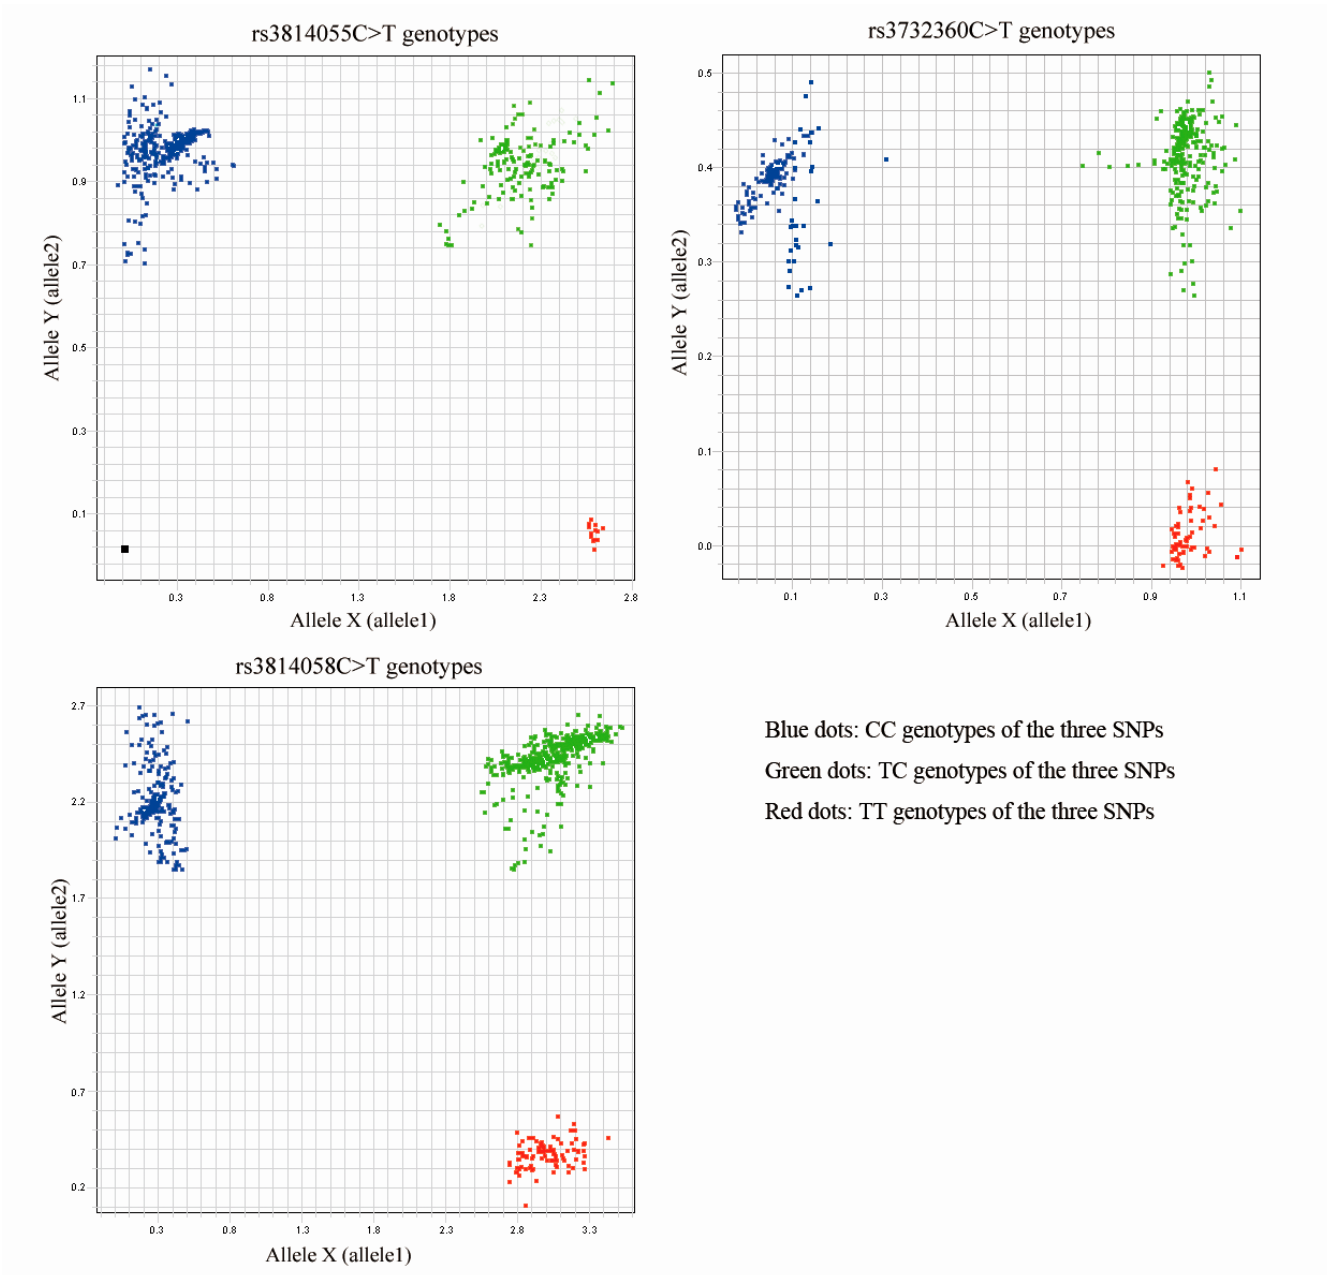

(C)
